# Supplementary material for: Unfolded Protein Response and Scaffold Independent Pheromone MAP Kinase Signaling Control Verticillium dahliae Growth, Development, and Plant Pathogenesis
Source: MDPI journal article supplement (doi:10.3390/jof7040305), 2021-04-15
Supplement: s1 [file s1]

## Supplementary Material

### Supplementary Images S1

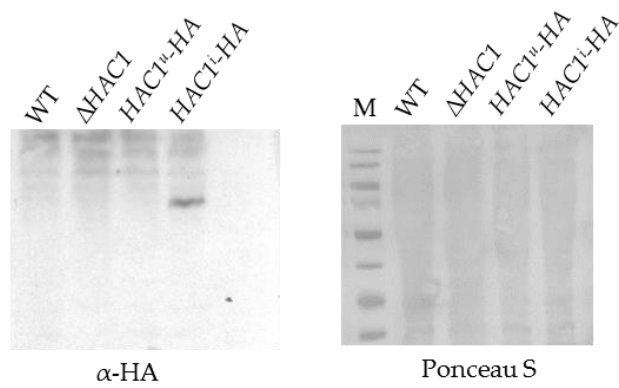

**Images Figure 2:** Immunoblot of *V. dahliae* Hac1 proteins in HAC1<sup>u</sup>-HA and HAC1<sup>i</sup>-HA. M: PageRuler Prestained Protein Ladder 10–180 kDa (Thermo Fisher Scientific, Waltham, MA, USA).

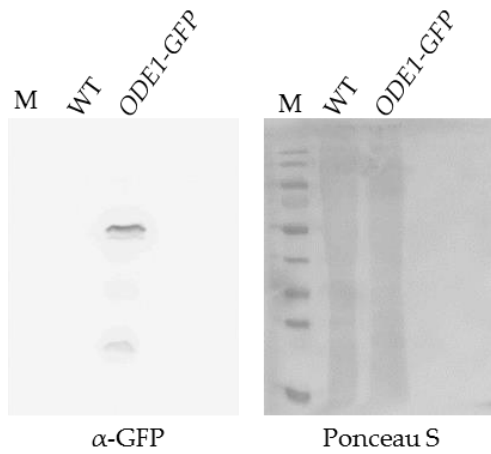

**Images Figure 4:** Immunoblot of *V. dahliae* Ode1-GFP. M: PageRuler Prestained Protein Ladder 10–180 kDa (Thermo Fisher Scientific, Waltham, MA, USA).

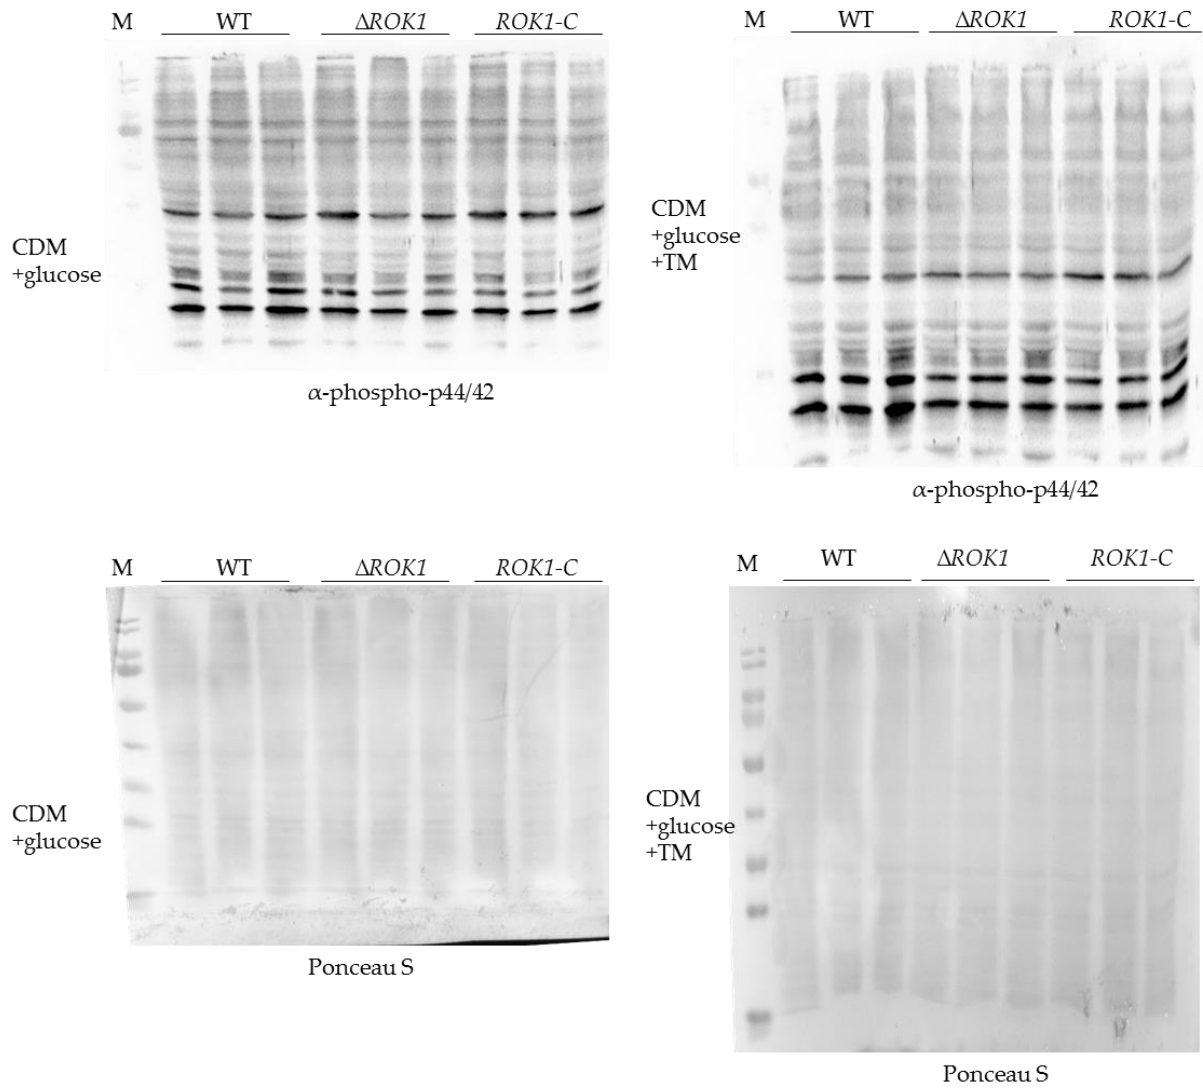

**Images Figure S9:** Immunoblots of *V. dahliae*  $ROK1$  deletion and  $ROK1-C$  complementation strains. M: PageRuler Prestained Protein Ladder 10–180 kDa (Thermo Fisher Scientific, Waltham, MA, USA).
