# Supplementary material for: Unfolded Protein Response and Scaffold Independent Pheromone MAP Kinase Signaling Control Verticillium dahliae Growth, Development, and Plant Pathogenesis
Source: J Fungi (Basel). 2021 Apr 15;7(4):305. doi: 10.3390/jof7040305 (PMC8071499; doi:10.3390/jof7040305)
Supplement: Supplementary file 1 [file jof-07-00305-s001.zip › Data_S1.xlsx]

## Sheet: Figure 2a
Figure 2a
BIP1 and HAC1 expression levels were normalized to the housekeeping genes H2A and EIF2B relative to wildtype expression levels. Each value represents the mean value of three pipetting replicates.
		Relative normalized BIP1 expression
		WT	ΔHAC1	HAC1-C
	Experiment 1	1	0.286905	1.23836
	Experiment 2	1	0.481383	1.85086
	Experiment 3	1	0.178331	0.794498
	n	3	3	3
		Relative normalized HAC1 expression
		WT	ΔHAC1	HAC1-C	HAC1u	HAC1i
Experiment 1	Replicate 1	1	5.16112e-05	1.25491	0.369452	0.614583
	Replicate 2				0.458547	0.608403
Experiment 2	Replicate 1	1	2.75975e-05	0.92875	0.355721	0.638194
	Replicate 2				0.298905	0.503239
Experiment 3	Replicate 1	1	0.00366548	1.15908	0.370062	0.830977
	Replicate 2				0.585443	0.844528
n		3	3	3	6	6

## Sheet: Figure 2d
Figure 2d
Colony diameter in mm ten days after spot inoculation on CDM or CDM supplemented with tunicamycin (TM = 1 µg/ml). The given values represent means of two measurements per colony for three colonies each.
Mean values and standard deviations of all replicates per strain were calculated. Wildtype was set to 100% and relative values per strain were determined.
		CDM
		WT	ΔHAC1	HAC1-C	HAC1u	HAC1i
Experiment 1	Replicate 1	47	41.6667	47.1667	47.1667	41.8333
	Replicate 2	47.3333	41.5		47.6667	41.5
Experiment 2	Replicate 1	48.3333	41.3333	47.3333	47.5	41.3333
	Replicate 2	48.3333			47.5	41.1667
Experiment 3	Replicate 1	47	41.5	46.8333	46.5	39.1667
	Replicate 2	46.5	41.5		46	39.6667
n		6	5	3	6	6
		CDM+TM
		WT	ΔHAC1	HAC1-C	HAC1u	HAC1i
Experiment 1	Replicate 1	31.5	25.75	30.25	28.5	38.25
	Replicate 2	29.25	25		29.75	37.75
Experiment 2	Replicate 1	32.5	29.8333	26.5	30.5	35.1667
	Replicate 2	29.6667			27.8333	33.3333
Experiment 3	Replicate 1	31.5	25.8333	31.3333	30	36
	Replicate 2	30.8333	25.5		30.8333	35.6667
n		6	5	3	6	6

## Sheet: Figure 3b
Figure 3b
Values indicate spore numbers determined per culture for three technical replicates. Mean values of three technical replicates were calculated as one biological replicate.
Mean values and standard deviations from all biological replicates were calculated. The mean of the wildtype was set to 100%. Other data were calculated relative to wildtype.
		WT	ΔHAC1	HAC1-C
Experiment 1	Replicate 1	162500000	16010000	1.039e+08
		139200000	21500000	139800000
		144800000	19580000	137400000
	Replicate 2		36820000
			27750000
			26530000
Experiment 2	Replicate 1	145000000	32430000	95450000
		163400000	41170000	138800000
		126800000	43020000	118200000
	Replicate 2		17420000
			13150000
			16940000
Experiment 3	Replicate 1	118500000	14460000	124600000
		121700000	15950000	143400000
		127600000	12090000	101700000
	Replicate 2		9469000
			11940000
			11300000
Experiment 4	Replicate 1	144600000	12140000	156600000
		128200000	15730000	128600000
		171900000	12330000	139600000
	Replicate 2		13970000
			16840000
			15100000
	n	4	8	4

## Sheet: Figure 3c
Figure 3c
Two independent ∆HAC1 transformants were tested in comparison to wildtype and a single HAC1‑C transformant, each in two independent plant infection experiments with at least 15 plants each.
Plants were catagorized according to the decription in the material and method section.
	Mock	WT	ΔHAC1	HAC1-C
healthy plants	29	16	54	11
weak symptoms	1	16	4	11
strong symptoms	0	5	2	20
heavy symptoms	0	0	0	3
number of plants (n)	30	60	60	45

## Sheet: Figure 5b
Figure 5b
Colony diameter in mm three, six, and nine days after spot inoculation on CDM with cellulose either with or without supplemented linoleic acid (LA, 0.125 mg/ml). The given values represent means of two measurements per colony for three colonies each.
Mean values and standard deviations of all replicates per strain were calculated. Wildtype was set to 100% and relative values per strain were determined.
		CDM+cellulose
		3 days			6 days			9 days
		WT	ΔODE1	ODE1-GFP	WT	ΔODE1	ODE1-GFP	WT	ΔODE1	ODE1-GFP
Experiment 1	Replicate 1	10.3333	6.66667	10.3333	21.3333	11	20.8333	33.5	16	32.5
	Replicate 2		7.16667	10		11.3333	20.8333		16.3333	32
Experiment 2	Replicate 1	10.8333	7.33333	11	22.5	12.1667	21.5	34.1667	16.5	32.6667
	Replicate 2	10.6667	7.33333	11	22.5	12	22.5	34	16.5	34
	n	3	4	4	3	4	4	3	4	4
		CDM+cellulose+LA
		3 days			6 days			9 days
		WT	ΔODE1	ODE1-GFP	WT	ΔODE1	ODE1-GFP	WT	ΔODE1	ODE1-GFP
Experiment 1	Replicate 1	13	11.8333	11.5	23.3333	18	22.3333	35.3333	26.3333	33.3333
	Replicate 2		10.3333	12.3333		17	22.6667		25.6667	33.5
Experiment 2	Replicate 1	12.8333	11.1667	13.8333	23.5	17.8333	24.1667	34.8333	24.6667	34.8333
	Replicate 2	13.5	11.1667	13.3333	24.1667	17.8333	23.8333	36	24.3333	34.5
	n	3	4	4	3	4	4	3	4	4

## Sheet: Figure 5d
Figure 5d
Two independent ∆ODE1 and ODE1-GFP transformants (five independent tests per strain) were tested in comparison to wildtype in three independent plant infection experiments with at least 13 plants each.
Plants were catagorized according to the decription in the material and method section.
	Mock	WT	ΔODE1	ODE1-GFP
healthy plants	73	9	19	15
weak symptoms	0	21	12	15
strong symptoms	1	35	36	30
heavy symptoms	0	10	6	12
number of plants (n)	74	75	73	72

## Sheet: Figure 7b
Figure 7b
Colony diameter in mm nine days after spot inoculation on CDM with either sucrose or cellulose. The given values represent means of two measurements per colony for three colonies each.
Mean values and standard deviations of all biological replicates per strain were calculated. Wildtype was set to 100% and relative values per strain were determined.
		CDM+sucrose
		WT	∆HAM5	∆VMK1	VMK1-C	∆MEK2	MEK2-C	∆HAM5∆VMK1	∆HAM5∆MEK2
Experiment 1	Replicate 1	41	40	37	40.1667	36.5	39.5	36	36
	Replicate 2		40.75	35.75		36.3333
Experiment 2	Replicate 1	41.5	41.5	36.8333	41.6667	38	41.8333	38	37
	Replicate 2		41.5	37.3333		37.6667
Experiment 3	Replicate 1	40.5	40.5	36.6667	40.5	37.1667	40.5	37.5	36.8333
	Replicate 2		40.5	36.3333		0.7
	n	3	6	6	3	6	3	3	3
		CDM+cellulose
		WT	∆HAM5	∆VMK1	VMK1-C	∆MEK2	MEK2-C	∆HAM5∆VMK1	∆HAM5∆MEK2
Experiment 1	Replicate 1	32.3333	31.6667	28.1667	32.1667	29.25	31.5	28.6667	29.3333
	Replicate 2		32.1667	28.5		28
Experiment 2	Replicate 1	32.8333	32.1667	29.5	32.3333	29.3333	32.5	30.3333	29.6667
	Replicate 2		32.3333	29.6667		29.3333
Experiment 3	Replicate 1	33.3333	33.5	32.1667	33.6667	30.5	33.8333	31	31.1667
	Replicate 2		33.5	31.1667		30.8333
	n	3	6	6	3	6	3	3	3

## Sheet: Figure 7c
Figure 7c
Values represent the brightness factor of the colony minus the brightness factor of the medium. Each experiment is a biological replicate. In each experiment the brightness factor of three colonies per strain was determined as three technical replicates. Mean values and standard deviations of the biological replicates were calculated. The mean of the wildtype was set to 100%. Other data were calc…
	WT	∆HAM5	∆VMK1	VMK1-C	∆MEK2	MEK2-C	∆HAM5∆VMK1	∆HAM5∆MEK2
Experiment 1	100	101.257	53.3127	103.89	56.6794	109.021	48.9371	56.5027
		100.772	58.9767		55.7023
Experiment 2	100	85.6737	45.9506	122.02	46.367	124.865	46.9478	49.6653
		106.476	46.0727		54.6659
Experiment 3	100	89.8098	66.9617	103.185	67.3916	111.477	66.5128	66.6568
		97.2596	67.9878		67.3173
n	3	6	6	3	6	3	3	3

## Sheet: Figure 7d
Figure 7d
Two independent ∆HAM5 transformants were tested in three independent experiments each in comparison to a single transformant each per double deletion strain (∆HAM5∆VMK1, ∆HAM5∆MEK2), complementation strain (VMK1-C, MEK2-C), and wildtype as well as a single or two independent ∆VMK1 (four independent tests) and ∆MEK2 (five independent tests) single deletion strains
At least 13 plants were evaluated per independent test per strain. Plants were catagorized according to the decription in the material and method section.
	Mock	WT	∆HAM5	∆VMK1	VMK1-C	∆MEK2	MEK2-C	∆HAM5∆VMK1	∆HAM5∆MEK2
healthy plants	44	12	15	59	4	71	8	43	45
weak symptoms	0	5	19	1	7	2	8	1	0
strong symptoms	0	21	38	0	23	0	23	0	0
heavy symptoms	0	7	18	0	10	0	4	0	0
n	44	45	90	60	44	73	43	44	45

## Sheet: Figure 8b
Figure 8b
Values represent the brightness factor of the colony minus the brightness factor of the medium. Each experiment is a biological replicate. In each experiment the brightness factor of three colonies per strain was determined as three technical replicates. Mean values and standard deviations of the biological replicates were calculated. The mean of the wildtype was set to 100%. Other data were calc…
	WT	ΔROK1	ROK1-C
Experiment 1	-35.574	-75.7937	-60.1713
Experiment 2	-46.5083	-73.188	-60.5183
Experiment 3	-38.8117	-74.0687	-32.1903
n	3	3	3

[truncated: 3 more sheets: Figure 8c, Figure 8d, Figure S5]
